# Supplementary material
Source: PubMed Central journal article supplement (PMC1914103)

## Supplementary Data

Negative regulation of SEK1 signaling by serum- and glucocorticoid-inducible protein kinase 1

Myung Jin Kim, Ji Soo Chae, Kwang Je Kim, Sang Gil Hwang, Kyoung Wan Yoon, Eun Kyung Kim, Hee Jae Yun, Jun-Ho Cho, Jeehyun Kim, Bong-Woo Kim, Hyung-chul Kim, Sang Sun Kang, Florian Lang, Ssang-Goo Cho, and Eui-Ju Choi

### Figure legends

**Figure S1 SGK1 inhibits the MEKK1-induced activation of SEK1, but not that of MKK7.** 293T cells were transfected for 48 h with expression vectors for GST-SEK1 (A) or GST-MKK7 (B) and indicated combinations of  $\Delta$ MEKK1-Flag and HA-SGK1-CA. Cell lysates were subjected to immunoprecipitation with anti-GST antibody, and the resulting precipitates were assayed for SEK1 (A) or MKK7 (B) activity by immune complex kinase assay with the use of GST-JNK3(K55R) as substrate. The amounts of the recombinant proteins in cell lysates were also examined by immunoblot (IB) analysis with the indicated antibodies.  $\Delta$ MEKK1 is a constitutively active form of MEKK1.

Figure S1

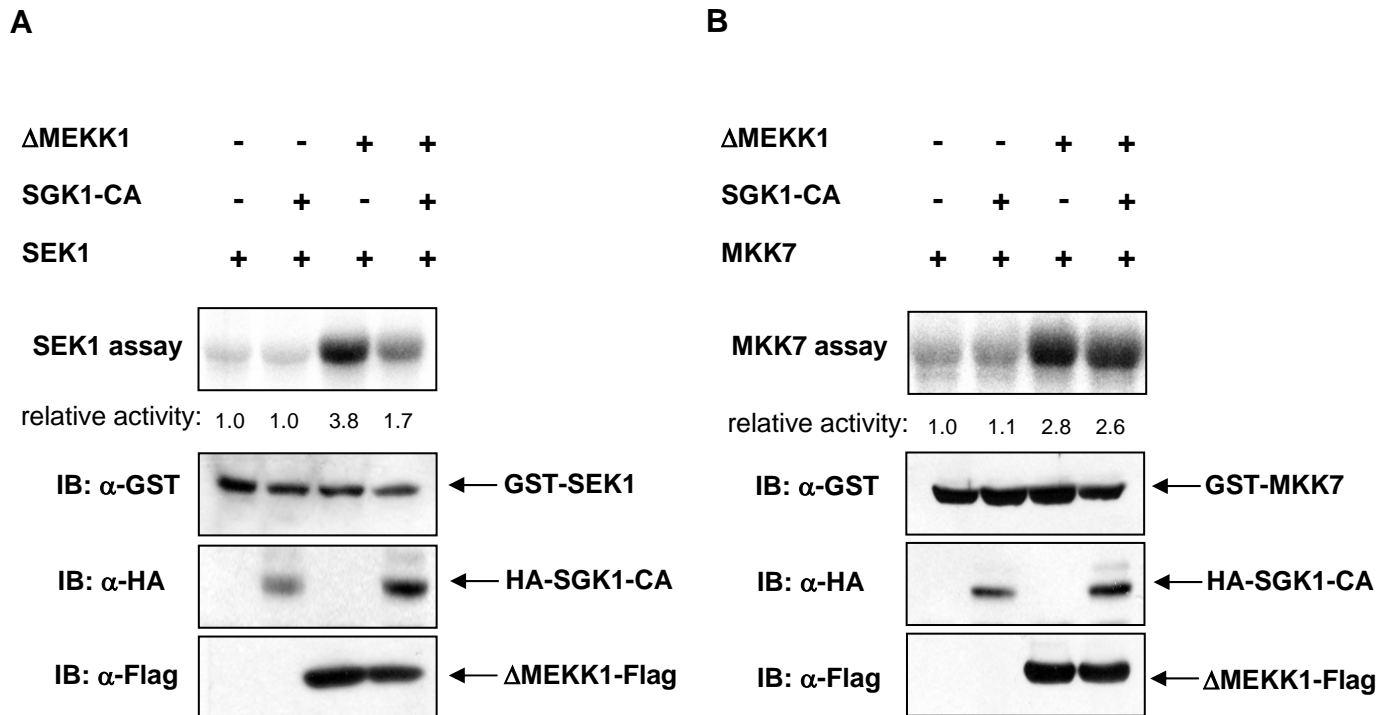

Supplement: 7601755s1.pdf [file 7601755s1.pdf]
